# Supplementary material for: Air Pollution and Respiratory Infections during Early Childhood: An Analysis of 10 European Birth Cohorts within the ESCAPE Project
Source: PubMed Central journal article supplement (PMC3888562; doi:10.1289/ehp.1306755), 2013-10-22
Supplement: ehp.1306755.s001.508.pdf [file ehp.1306755.s001.508.pdf]

## **Supplemental Material**

### **Air Pollution and Respiratory Infections during Early Childhood: An Analysis of 10 European Birth Cohorts within the ESCAPE Project**

Elaina A. MacIntyre, Ulrike Gehring, Anna Mölter, Elaine Fuertes, Claudia Klümper, Ursula Krämer, Ulrich Quass, Barbara Hoffmann, Mireia Gascon, Bert Brunekreef, Gerard H. Koppelman, Rob Beelen, Gerard Hoek, Matthias Birk, Johan C. de Jongste, H.A. Smit, Josef Cyrus, Olena Gruzieva, Michal Korek, Anna Bergström, Raymond M. Agius, Frank de Vocht, Angela Simpson, Daniela Porta, Francesco Forastiere, Chiara Badaloni, Giulia Cesaroni, Ana Esplugues, Ana Fernández-Somoano, Aitana Lerxundi, Jordi Sunyer, Marta Cirach, Mark J. Nieuwenhuijsen, Göran Pershagen, and Joachim Heinrich

#### **Table of Contents**

|                                                                           |       |
|---------------------------------------------------------------------------|-------|
| Specific wording of parental administered questionnaires                  | - 2 - |
| Table S1. Distribution of adjustment covariates, by cohort                | - 3 - |
| Table S2. Air pollution distributions, by cohort                          | - 5 - |
| Table S3. Correlations between pollutants, by cohort                      | - 7 - |
| Table S4. Combined estimates using two-pollutant models                   | -9 -  |
| Table S5. Combined estimates stratified by gender                         | -10 - |
| Table S6. Combined estimates stratified by parental socio-economic status | -11 - |
| Table S7. Combined estimates stratified by residential mobility           | -12 - |
| Table S8. Combined estimates using back-extrapolated air pollution data   | -13-  |

## **Specific wording of parental administered questionnaires**

### **BAMSE**

*Asked at 12 months*

Has a doctor ever diagnosed your child as having [pneumonia/croup or pseudocroup]?

Has your child had earaches that were treated with antibiotics (e.g., penicillin)?

*Asked at 24 months*

Has a doctor diagnosed your child as having [pneumonia/croup or pseudocroup] after the age of one year?

Has your child had earaches, ear infections with fluid behind the eardrum after the age of one year? (with antibiotic treatment)

### **GASPII**

*Asked at 6 and 15 months*

Has your child had any of the following illnesses? (pneumonia, otitis media)

### **GINIplus**

*Asked at 12 and 24 months*

Has your child received a physician diagnosis of [pneumonia/croup] during the past 12 months?

### **INMA**

*Asked at 12 (Valencia), 14 (Gipuzkoa and Sabadell) and 18 (Asturias) months*

Has a doctor told you that your son/daughter has had [otitis/pneumonia]?

### **LISApplus**

*Asked at 6, 12, 18 and 24 months*

Has your child received a physician diagnosis of [pneumonia/otitis media/croup] during the past 6 months?

### **MAAS**

*Asked at 3 years*

Has your child had any of the following illnesses? (Pneumonia, Croup)

### **PIAMA**

*Asked at 12 and 24 months*

Did a doctor diagnose [infection of the middle ear/pneumonia] in your child in the last 12 months?

Supplemental Material, Table S1. Distribution of adjustment covariates, by cohort.

|                                    | <b>BAMSE</b>   | <b>GASPII</b>              | <b>GINI/LISA</b> | <b>GINI/LISA</b> | <b>INMA</b>     | <b>INMA</b>     | <b>INMA</b>     | <b>INMA</b>     | <b>MAAS</b>   | <b>PIAMA</b>   |
|------------------------------------|----------------|----------------------------|------------------|------------------|-----------------|-----------------|-----------------|-----------------|---------------|----------------|
|                                    | <b>N (%)</b>   | <b>N (%)</b>               | <b>South</b>     | <b>North</b>     | <b>Asturias</b> | <b>Gipuzkoa</b> | <b>Sabadell</b> | <b>Valencia</b> | <b>N (%)</b>  | <b>N (%)</b>   |
|                                    |                |                            | <b>N (%)</b>     | <b>N (%)</b>     | <b>N (%)</b>    | <b>N (%)</b>    | <b>N (%)</b>    | <b>N (%)</b>    |               |                |
| Total number of children           | 3821<br>(100)  | 678<br>(100)               | 3321 (100)       | 2460 (100)       | 360 (100)       | 437 (100)       | 402 (100)       | 559 (100)       | 695<br>(100)  | 3475<br>(100)  |
| Male gender                        | 1943<br>(50.8) | 342<br>(50.4)              | 1739 (52.4)      | 1266 (51.5)      | 186 (51.7)      | 217 (49.7)      | 214 (53.2)      | 293 (52.4)      | 376<br>(55.1) | 1788<br>(51.5) |
| Older siblings                     | 1835<br>(48.0) | 270<br>(39.8)              | 1368 (41.2)      | 1319 (53.6)      | 140 (38.9)      | 196 (44.9)      | 166 (41.3)      | 244 (43.7)      | 340<br>(48.9) | 1753<br>(50.5) |
| Breastfeeding at 6 months          | 1833<br>(48.0) | 361<br>(53.2)              | 1773 (53.4)      | 972 (39.5)       | 217 (60.3)      | 352 (80.6)      | 323 (80.4)      | 368 (65.8)      | 212<br>(30.5) | 891<br>(25.6)  |
| Parental atopy                     | 1131<br>(29.6) | 186<br>(27.4)              | 2447 (74.6)      | 1475 (60.0)      | 140 (38.9)      | 176 (40.3)      | 206 (51.2)      | 225 (40.3)      | 576<br>(82.9) | 1747<br>(50.3) |
| Maternal smoking during pregnancy  | 482<br>(12.6)  | 82<br>(12.1)               | 430 (13.0)       | 408 (16.6)       | 106 (29.4)      | 109 (24.9)      | 122 (30.4)      | 239 (42.8)      | 74<br>(10.6)  | 577<br>(16.6)  |
| Tobacco smoke in the home at 1yr   | 436<br>(11.4)  | 208<br>(30.7) <sup>b</sup> | 569 (17.1)       | 573 (23.3)       | -               | -               | -               | -               | 295<br>(42.4) | 1079<br>(31.1) |
| Tobacco smoke in the home at 2yrs  | 511<br>(13.4)  | -                          | 835 (25.1)       | 996 (40.5)       | -               | -               | -               | -               | -             | 1158<br>(33.3) |
| Daycare at 1yr                     | -              | 178<br>(26.3) <sup>b</sup> | 205 (6.3)        | 41 (1.7)         | 177 (49.2)      | 218 (49.9)      | 122 (30.3)      | 114 (20.4)      | -             | 834<br>(24.1)  |
| Daycare at 2yrs                    | 2664<br>(72.1) | -                          | 474 (14.3)       | 61 (2.5)         | -               | -               | -               | -               | 493<br>(70.9) | 1032<br>(29.7) |
| Socio-economic status <sup>a</sup> |                |                            |                  |                  |                 |                 |                 |                 |               |                |
| Low                                | 87 (2.3)       | 61 (9.0)                   | 178 (5.4)        | 334 (13.6)       | 33 (9.2)        | 44 (10.1)       | 40 (10.0)       | 32 (5.7)        | 105<br>(15.1) | 438<br>(12.6)  |
| Middle                             | 1688<br>(44.2) | 297<br>(43.8)              | 589 (17.7)       | 980 (39.8)       | 57 (15.8)       | 85 (19.5)       | 74 (18.4)       | 94 (16.8)       | 273<br>(39.3) | 1273<br>(36.6) |
| High                               | 2044<br>(53.5) | 320<br>(47.2)              | 2554 (76.9)      | 1146 (46.6)      | 270 (75.0)      | 308 (70.5)      | 288 (71.6)      | 433 (77.5)      | 201<br>(28.9) | 1764<br>(50.8) |
| Very high <sup>b</sup>             |                |                            |                  |                  |                 |                 |                 |                 | 116<br>(16.7) |                |
| Municipality/region <sup>c</sup>   |                |                            |                  |                  |                 |                 |                 |                 |               |                |
| 1                                  | 1143<br>(29.9) |                            |                  |                  |                 |                 |                 |                 |               | 1104<br>(31.8) |
| 2                                  | 1102<br>(28.8) |                            |                  |                  |                 |                 |                 |                 |               | 1422<br>(40.9) |

|                                                  | <b>BAMSE</b>   | <b>GASPII</b> | <b>GINI/LISA</b> | <b>GINI/LISA</b> | <b>INMA</b>     | <b>INMA</b>     | <b>INMA</b>     | <b>INMA</b>     | <b>MAAS</b>   | <b>PIAMA</b>   |
|--------------------------------------------------|----------------|---------------|------------------|------------------|-----------------|-----------------|-----------------|-----------------|---------------|----------------|
|                                                  | <b>N (%)</b>   | <b>N (%)</b>  | <b>South</b>     | <b>North</b>     | <b>Asturias</b> | <b>Gipuzkoa</b> | <b>Sabadell</b> | <b>Valencia</b> | <b>N (%)</b>  | <b>N (%)</b>   |
|                                                  |                |               | <b>N (%)</b>     | <b>N (%)</b>     | <b>N (%)</b>    | <b>N (%)</b>    | <b>N (%)</b>    | <b>N (%)</b>    |               | <b>N (%)</b>   |
| 3                                                | 1003<br>(26.3) |               |                  |                  |                 |                 |                 |                 |               | 949<br>(27.3)  |
| 4                                                | 573<br>(15.0)  |               |                  |                  |                 |                 |                 |                 |               |                |
| Intervention arm                                 | -              | -             | 902 (43.4)       | 782 (35.7)       | -               | -               | -               | -               | -             | 319<br>(9.2)   |
| Gas stove in the home                            | 438<br>(11.5)  | 672<br>(99.1) | 289 (8.7)        | 116 (4.7)        | 69 (19.2)       | 66 (15.1)       | 251 (62.4)      | 352 (63.0)      | 538<br>(77.5) | 2909<br>(83.7) |
| Visible mold or dampness in the home             | 967<br>(25.3)  | 110<br>(16.2) | 1174 (35.4)      | 536 (21.8)       | 74 (20.6)       | 55 (12.6)       | 67 (16.7)       | 46 (8.2)        | 123<br>(17.7) | 1744<br>(50.2) |
| Maternal age under 30 years at time of birth     | 1953<br>(51.1) | 188<br>(27.7) | 1113 (33.5)      | 1259 (51.2)      | 151 (41.9)      | 200 (45.8)      | 212 (52.7)      | 311 (55.6)      | 223<br>(36.1) | 1788<br>(51.5) |
| Birth season                                     |                |               |                  |                  |                 |                 |                 |                 |               |                |
| Winter (Jan-Mar)                                 | 677<br>(17.7)  | 126<br>(18.6) | 996 (30.1)       | 741 (30.1)       | 76 (21.2)       | 124 (28.4)      | 92 (22.9)       | 145 (25.9)      | 207<br>(29.8) | 642<br>(18.5)  |
| Spring (Apr-Jun)                                 | 1124<br>(29.4) | 233<br>(34.4) | 886 (26.7)       | 689 (28.0)       | 100 (27.8)      | 84 (19.2)       | 80 (19.9)       | 186 (33.3)      | 193<br>(27.8) | 906<br>(26.1)  |
| Summer (Jul-Sep)                                 | 1109<br>(29.0) | 189<br>(27.9) | 764 (23.0)       | 555 (22.6)       | 120 (33.3)      | 110 (25.2)      | 92 (22.9)       | 124 (22.2)      | 159<br>(22.9) | 1080<br>(31.1) |
| Fall (Oct-Dec)                                   | 911<br>(23.9)  | 130<br>(19.2) | 675 (20.3)       | 475 (19.3)       | 64 (17.8)       | 119 (27.2)      | 138 (34.3)      | 104 (18.6)      | 136<br>(19.6) | 847<br>(24.4)  |
| Residential mobility at anytime during follow-up | 1411<br>(36.9) | 69<br>(10.2)  | 959 (30.6)       | 511 (20.8)       | 52 (15.0)       | 21 (4.9)        | 39 (10.0)       | 51 (9.2)        | 138<br>(21.2) | 588<br>(17.0)  |

<sup>a</sup> Highest education attained by either parent (BAMSE, GINI/LISA North, GINI/LISA South, PIAMA, INMA); highest occupational level by either parent (GASPII); or household income (MAAS: less than £10,000; £10,000-20,000; £20,000-30,000; more than £30,000); <sup>b</sup> MAAS only; <sup>c</sup> BAMSE municipality: 1- Stockholm, 2- Jarfalla, 3- Solna, 4- Sundbyberg; PIAMA region: 1-North, 2-Middle, 3-West.

Supplemental Material, Table S2. Air pollution distributions, by cohort.

|                                                    | BAMSE     | GASPII     | GINI/LISA<br>South | GINI/LISA<br>North | INMA<br>Asturias | INMA<br>Gipuzkoa | INMA<br>Sabadell | INMA<br>Valencia | MAAS      | PIAMA     |
|----------------------------------------------------|-----------|------------|--------------------|--------------------|------------------|------------------|------------------|------------------|-----------|-----------|
| NO <sub>2</sub> (µg/m <sup>3</sup> )               |           |            |                    |                    |                  |                  |                  |                  |           |           |
| Mean ± SD                                          | 14.1±5.4  | 44.6±9.9   | 21.8±6.1           | 23.7±3.3           | 23.4±10.6        | 18.7±4.3         | 41.7±10.6        | 27.4±11.8        | 23.0±2.0  | 23.0±6.6  |
| Median                                             | 12.4      | 43.2       | 20.8               | 23.2               | 22.2             | 18.4             | 41.7             | 27.9             | 23.0      | 23.1      |
| IQR                                                | 9.3       | 10.4       | 8.3                | 3.2                | 14.4             | 5.7              | 12.4             | 18.1             | 2.4       | 8.4       |
| Range (Min-Max)                                    | 6.0-33.0  | 22.5-85.1  | 11.5-61.1          | 19.7-62.8          | 0.0-52.6         | 9.8-32.3         | 17.8-87.5        | 2.6-72.9         | 16.0-30.4 | 8.7-59.6  |
| NO <sub>x</sub> (µg/m <sup>3</sup> )               |           |            |                    |                    |                  |                  |                  |                  |           |           |
| Mean ± SD                                          | 25.6±12.0 | 70.4±20.6  | 36.3±10.4          | 34.6±9.0           | 47.4±28.0        | 37.9±8.4         | 71.9±23.9        | 44.2±21.9        | 38.9±4.9  | 34.0±11.5 |
| Median                                             | 20.9      | 65.8       | 34.6               | 33.3               | 44.0             | 37.2             | 69.7             | 44.7             | 38.7      | 32.8      |
| IQR                                                | 18.2      | 23.9       | 12.2               | 8.4                | 39.0             | 11.1             | 21.2             | 31.1             | 5.2       | 11.0      |
| Range (Min-Max)                                    | 11.5-86.3 | 25.7-154.7 | 19.7-121.4         | 23.9-147.7         | 0.0-128.9        | 20.6-64.9        | 28.9-208.0       | 0.7-140.8        | 26.1-77.8 | 16.5-98.9 |
| PM <sub>2.5</sub> (µg/m <sup>3</sup> )             |           |            |                    |                    |                  |                  |                  |                  |           |           |
| Mean ± SD                                          | 7.8±8.1   | 19.5±2.1   | 13.4±1.0           | 17.4±0.7           | -                | -                | 14.6±1.3         | -                | 9.5±0.2   | 16.4±0.7  |
| Median                                             | 8.1       | 18.8       | 13.3               | 17.2               | -                | -                | 14.6             | -                | 9.4       | 16.5      |
| IQR                                                | 1.9       | 2.0        | 1.2                | 0.9                | -                | -                | 1.1              | -                | 0.0       | 1.2       |
| Range (Min-Max)                                    | 4.2-11.4  | 17.0-27.4  | 10.6-18.3          | 15.8-21.5          | -                | -                | 11.0-20.5        | -                | 9.4-11.0  | 15.3-21.1 |
| PM <sub>2.5</sub> absorbance (10 <sup>-5</sup> /m) |           |            |                    |                    |                  |                  |                  |                  |           |           |
| Mean ± SD                                          | 0.7±0.2   | 2.7±0.6    | 1.7±0.2            | 1.2±0.2            | -                | -                | 2.2±0.4          | -                | 1.1±0.2   | 1.2±0.2   |
| Median                                             | 0.6       | 2.5        | 1.7                | 1.2                | -                | -                | 2.2              | -                | 1.1       | 1.2       |
| IQR                                                | 0.3       | 0.4        | 0.2                | 0.2                | -                | -                | 0.5              | -                | 0.2       | 0.3       |
| Range (Min-Max)                                    | 0.4-1.3   | 2.2-4.8    | 1.3-3.6            | 1.0-3.1            | -                | -                | 1.4-4.3          | -                | 0.7-2.0   | 0.8-3.0   |
| PM <sub>10</sub> (µg/m <sup>3</sup> )              |           |            |                    |                    |                  |                  |                  |                  |           |           |
| Mean ± SD                                          | 15.7±3.9  | 36.9±5.7   | 20.4±2.4           | 25.5±1.2           | -                | -                | 27.0±3.4         | -                | 17.1±0.9  | 24.9±1.2  |
| Median                                             | 15.6      | 34.9       | 20.4               | 25.2               | -                | -                | 26.4             | -                | 17.0      | 24.6      |
| IQR                                                | 3.9       | 6.1        | 2.9                | 1.6                | -                | -                | 3.4              | -                | 0.2       | 1.2       |
| Range (Min-Max)                                    | 6.0-30.9  | 29.7-58.2  | 14.8-34.4          | 23.9-33.9          | -                | -                | 21.8-39.0        | -                | 12.7-22.7 | 23.7-33.2 |
| Coarse PM (µg/m <sup>3</sup> )                     |           |            |                    |                    |                  |                  |                  |                  |           |           |
| Mean ± SD                                          | 7.9±3.0   | 16.8±3.9   | 6.8±1.5            | 8.5±0.7            | -                | -                | 11.5±2.3         | -                | 7.0±0.9   | 8.4±0.8   |
| Median                                             | 7.7       | 15.7       | 6.5                | 8.4                | -                | -                | 11.3             | -                | 6.9       | 8.1       |
| IQR                                                | 3.0       | 4.3        | 2.0                | 0.7                | -                | -                | 2.5              | -                | 0.8       | 0.8       |
| Range (Min-Max)                                    | 0.7-20.2  | 10.8-31.5  | 4.1-16.0           | 1.9-13.8           | -                | -                | 8.6-20.6         | -                | 5.0-11.5  | 7.6-14.0  |

|                                                               | <b>BAMSE</b> | <b>GASPII</b> | <b>GINI/LISA<br/>South</b> | <b>GINI/LISA<br/>North</b> | <b>INMA<br/>Asturias</b> | <b>INMA<br/>Gipuzkoa</b> | <b>INMA<br/>Sabadell</b> | <b>INMA<br/>Valencia</b> | <b>MAAS</b>   | <b>PIAMA</b> |
|---------------------------------------------------------------|--------------|---------------|----------------------------|----------------------------|--------------------------|--------------------------|--------------------------|--------------------------|---------------|--------------|
| Traffic intensity on nearest street (vehicles/day)            |              |               |                            |                            |                          |                          |                          |                          |               |              |
| Mean ± SD                                                     | 2418±4593    | -             | 2711±7989                  | 1188±2600                  | -                        | -                        | -                        | -                        | 814±2257      | 1053±3301    |
| Median                                                        | 500          | -             | 500                        | 500                        | -                        | -                        | -                        | -                        | 500           | 215          |
| IQR                                                           | 1450         | -             | 0                          | 0                          | -                        | -                        | -                        | -                        | 0             | 436          |
| Range (Min-Max)                                               | 122-52020    | -             | 500-134000                 | 500-27522                  | -                        | -                        | -                        | -                        | 500-29590     | 0-54610      |
| Traffic load on all major roads (within 100m) (vehicle*m/day) |              |               |                            |                            |                          |                          |                          |                          |               |              |
| Mean ± SD                                                     | 1024574±1783 | -             | 1087791±311                | 284605±79854               | -                        | -                        | -                        | -                        | 710648±343341 | 542073±1488  |
|                                                               | 254          | -             | 6387                       | 5                          | -                        | -                        | -                        | -                        | 7             | 584          |
| Median                                                        | 0            | -             | 0                          | 0                          | -                        | -                        | -                        | -                        | 0             | 0            |
| IQR                                                           | 1621333      | -             | 1318179                    | 0                          | -                        | -                        | -                        | -                        | 0             | 0            |
| Range (Min-Max)                                               | 0-26100000   | -             | 0-52741070                 | 0-11178024                 | -                        | -                        | -                        | -                        | 0-63463780    | 0-23498579   |

Supplemental Material, Table S3. Correlations between pollutants, by cohort.

|                              | NO <sub>x</sub> | PM <sub>2.5</sub> | PM <sub>2.5</sub> absorbance | PM <sub>10</sub> | Coarse PM | Traffic, nearest | Traffic, major |
|------------------------------|-----------------|-------------------|------------------------------|------------------|-----------|------------------|----------------|
| <b>BAMSE</b>                 |                 |                   |                              |                  |           |                  |                |
| NO <sub>2</sub>              | .96             | .74               | .92                          | .63              | .64       | .56              | .45            |
| NO <sub>x</sub>              |                 | .67               | .82                          | .62              | .63       | .68              | .45            |
| PM <sub>2.5</sub>            |                 |                   | .79                          | .77              | .73       | .38              | .42            |
| PM <sub>2.5</sub> absorbance |                 |                   |                              | .96              | .91       | .44              | .51            |
| PM <sub>10</sub>             |                 |                   |                              |                  | .95       | .54              | .52            |
| Coarse PM                    |                 |                   |                              |                  |           | .56              | .54            |
| Traffic, nearest             |                 |                   |                              |                  |           |                  | .51            |
| <b>GASPII</b>                |                 |                   |                              |                  |           |                  |                |
| NO <sub>2</sub>              | .76             | .67               | .52                          | .62              | .76       |                  |                |
| NO <sub>x</sub>              |                 | .72               | .61                          | .69              | .76       |                  |                |
| PM <sub>2.5</sub>            |                 |                   | .78                          | .95              | .92       |                  |                |
| PM <sub>2.5</sub> absorbance |                 |                   |                              | .74              | .72       |                  |                |
| PM <sub>10</sub>             |                 |                   |                              |                  | .94       |                  |                |
| <b>GINI/LISA South</b>       |                 |                   |                              |                  |           |                  |                |
| NO <sub>2</sub>              | .95             | .43               | .75                          | .68              | .93       | .45              | .53            |
| NO <sub>x</sub>              |                 | .58               | .84                          | .72              | .91       | .52              | .62            |
| PM <sub>2.5</sub>            |                 |                   | .59                          | .47              | .43       | .38              | .43            |
| PM <sub>2.5</sub> absorbance |                 |                   |                              | .72              | .82       | .51              | .63            |
| PM <sub>10</sub>             |                 |                   |                              |                  | .76       | .28              | .34            |
| Coarse PM                    |                 |                   |                              |                  |           | .38              | .47            |
| Traffic, nearest             |                 |                   |                              |                  |           |                  | .68            |
| <b>GINI/LISA North</b>       |                 |                   |                              |                  |           |                  |                |
| NO <sub>2</sub>              | .98             | .72               | .75                          | .72              | .58       | .26              | .46            |
| NO <sub>x</sub>              |                 | .72               | .68                          | .71              | .56       | .25              | .33            |
| PM <sub>2.5</sub>            |                 |                   | .72                          | .83              | .63       | .14              | .24            |
| PM <sub>2.5</sub> absorbance |                 |                   |                              | .83              | .65       | .36              | .65            |
| PM <sub>10</sub>             |                 |                   |                              |                  | .68       | .13              | .26            |
| Coarse PM                    |                 |                   |                              |                  |           | .15              | .28            |

|                              | <b>NO<sub>x</sub></b> | <b>PM<sub>2.5</sub></b> | <b>PM<sub>2.5</sub> absorbance</b> | <b>PM<sub>10</sub></b> | <b>Coarse PM</b> | <b>Traffic, nearest</b> | <b>Traffic, major</b> |
|------------------------------|-----------------------|-------------------------|------------------------------------|------------------------|------------------|-------------------------|-----------------------|
| Traffic, nearest             |                       |                         |                                    |                        |                  |                         | .58                   |
| <b>INMA Sabadell</b>         |                       |                         |                                    |                        |                  |                         |                       |
| NO <sub>2</sub>              | .96                   | .80                     | .93                                | .81                    | .52              |                         |                       |
| NO <sub>x</sub>              |                       | .83                     | .93                                | .84                    | .61              |                         |                       |
| PM <sub>2.5</sub>            |                       |                         | .85                                | .78                    | .63              |                         |                       |
| PM <sub>2.5</sub> absorbance |                       |                         |                                    | .80                    | .55              |                         |                       |
| PM <sub>10</sub>             |                       |                         |                                    |                        | .87              |                         |                       |
| <b>MAAS</b>                  |                       |                         |                                    |                        |                  |                         |                       |
| NO <sub>2</sub>              | .66                   | .42                     | .40                                | .36                    | .34              | .19                     | .12                   |
| NO <sub>x</sub>              |                       | .26                     | .50                                | .31                    | .29              | .29                     | .54                   |
| PM <sub>2.5</sub>            |                       |                         | .19                                | .27                    | .26              | .00                     | .00                   |
| PM <sub>2.5</sub> absorbance |                       |                         |                                    | .44                    | .53              | .04                     | .26                   |
| PM <sub>10</sub>             |                       |                         |                                    |                        | .73              | .05                     | .11                   |
| Coarse PM                    |                       |                         |                                    |                        |                  | .04                     | .02                   |
| Traffic, nearest             |                       |                         |                                    |                        |                  |                         | .11                   |
| <b>PIAMA</b>                 |                       |                         |                                    |                        |                  |                         |                       |
| NO <sub>2</sub>              | .88                   | .72                     | .90                                | .80                    | .76              | .25                     | .37                   |
| NO <sub>x</sub>              |                       | .73                     | .89                                | .87                    | .76              | .30                     | .43                   |
| PM <sub>2.5</sub>            |                       |                         | .88                                | .87                    | .76              | .28                     | .37                   |
| PM <sub>2.5</sub> absorbance |                       |                         |                                    | .91                    | .77              | .33                     | .46                   |
| PM <sub>10</sub>             |                       |                         |                                    |                        | .80              | .29                     | .48                   |
| Coarse PM                    |                       |                         |                                    |                        |                  | .38                     | .40                   |
| Traffic, nearest             |                       |                         |                                    |                        |                  |                         | .48                   |



Supplemental Material, Table S4. Combined estimates using two-pollutant models.

|                                | Pneumonia |                          | Otitis Media |                    | Croup |                   |
|--------------------------------|-----------|--------------------------|--------------|--------------------|-------|-------------------|
|                                | N         | OR (95% CI) <sup>a</sup> | N            | OR (95% CI)        | N     | OR (95% CI)       |
| <b>Single pollutant models</b> |           |                          |              |                    |       |                   |
| NO <sub>2</sub>                | 16059     | 1.30* (1.02, 1.65)       | 11094        | 1.09* (1.02, 1.16) | 10170 | 0.96 (0.83, 1.12) |
| PM <sub>2.5</sub>              | 14009     | 2.58 (0.91, 7.27)        | 9738         | 1.06 (0.75, 1.49)  | 10170 | 0.90 (0.63, 1.30) |
| PM <sub>10</sub>               | 14703     | 1.76* (1.00, 3.09)       | 9738         | 0.98 (0.84, 1.14)  | 10170 | 0.92 (0.72, 1.18) |
| Coarse PM                      | 14703     | 1.24* (1.03, 1.50)       | 9738         | 0.97 (0.88, 1.08)  | 10170 | 0.97 (0.82, 1.15) |
| PM <sub>2.5</sub> absorbance   | 14703     | 1.99* (1.44, 2.75)       | 9738         | 1.08 (0.83, 1.39)  | 10170 | 1.03 (0.72, 1.47) |
| <b>Two pollutant models</b>    |           |                          |              |                    |       |                   |
| Model 1                        |           |                          |              |                    |       |                   |
| NO <sub>2</sub>                | 14703     | 1.16 (0.84, 1.59)        | 9738         | 1.06 (0.96, 1.18)  | 10170 | 0.98 (0.82, 1.17) |
| PM <sub>2.5</sub>              | 14703     | 1.91 (0.56, 6.57)        | 9738         | 0.94 (0.70, 1.28)  | 10170 | 0.89 (0.57, 1.39) |
| Model 2                        |           |                          |              |                    |       |                   |
| NO <sub>2</sub>                | 14703     | 1.28 (0.99, 1.66)        | 9738         | 1.08 (0.96, 1.22)  | 10170 | 1.01 (0.82, 1.23) |
| PM <sub>10</sub>               | 14703     | 1.10 (0.78, 1.56)        | 9738         | 0.91 (0.76, 1.10)  | 10170 | 0.91 (0.64, 1.31) |
| Model 3                        |           |                          |              |                    |       |                   |
| NO <sub>2</sub>                | 14703     | 1.38 (0.93, 2.05)        | 9738         | 1.13* (1.01, 1.26) | 10170 | 1.01 (0.78, 1.31) |
| Coarse PM                      | 14703     | 1.13 (0.72, 1.76)        | 9738         | 0.91 (0.80, 1.04)  | 10170 | 0.97 (0.78, 1.21) |
| Model 4                        |           |                          |              |                    |       |                   |
| NO <sub>2</sub>                | 14703     | 1.18 (0.74, 1.91)        | 9738         | 1.06 (0.93, 1.21)  | 10170 | 0.94 (0.75, 1.17) |
| PM <sub>2.5</sub> absorbance   | 14703     | 1.57 (0.81, 3.04)        | 9738         | 0.97 (0.67, 1.41)  | 10170 | 1.23 (0.73, 2.07) |

<sup>a</sup> Individual cohort models were adjusted for municipality (BAMSE), gender, older siblings, breastfeeding at 6 months, atopy of either parent, any daycare reported during follow-up, maternal smoking during pregnancy, any environmental tobacco smoke in the child's home reported during follow-up, visible mold or dampness in the home, gas stove, birth season, parental socio-economic status (low, medium, high), and intervention (GINIplus, MAAS, PIAMA).

\*Statistically significant elevated odds ratios ( $p < 0.05$ ). Associations are presented for the following increments in exposure: 10  $\mu\text{g}/\text{m}^3$  for NO<sub>2</sub>, 5  $\mu\text{g}/\text{m}^3$  for PM<sub>2.5</sub>, 10  $\mu\text{g}/\text{m}^3$  for PM<sub>10</sub>, 1 unit for PM<sub>2.5</sub> absorbance, 5  $\mu\text{g}/\text{m}^3$  for coarse PM.

Supplemental Material, Table S5. Combined estimates stratified by gender.

|                              | Pneumonia |                       |      |                     | Otitis Media |                       |      |                     | Croup |                       |      |                     |
|------------------------------|-----------|-----------------------|------|---------------------|--------------|-----------------------|------|---------------------|-------|-----------------------|------|---------------------|
|                              | N         | Female<br>OR (95% CI) | N    | Male<br>OR (95% CI) | N            | Female<br>OR (95% CI) | N    | Male<br>OR (95% CI) | N     | Female<br>OR (95% CI) | N    | Male<br>OR (95% CI) |
| NO <sub>2</sub>              | 7771      | 1.40* (1.13, 1.74)    | 8288 | 1.37 (0.97, 1.93)   | 5385         | 1.11 (0.96, 1.29)     | 5709 | 1.07 (0.98, 1.17)   | 4911  | 0.97 (0.76, 1.24)     | 5259 | 0.96 (0.79, 1.17)   |
| NO <sub>x</sub>              | 7771      | 1.30* (1.07, 1.58)    | 8288 | 1.38* (1.00, 1.91)  | 5385         | 1.07 (0.94, 1.22)     | 5709 | 1.03 (0.95, 1.13)   | 4911  | 1.01 (0.81, 1.27)     | 5259 | 0.98 (0.81, 1.17)   |
| PM <sub>2.5</sub>            | 6605      | 2.52 (0.82, 7.75)     | 7216 | 2.82 (0.89, 8.87)   | 4725         | 1.03 (0.62, 1.71)     | 5013 | 1.1 (0.73, 1.66)    | 4592  | 0.93 (0.52, 1.66)     | 4883 | 0.89 (0.52, 1.53)   |
| PM <sub>2.5</sub> absorbance | 6605      | 2.26* (1.38, 3.71)    | 7216 | 1.86* (1.20, 2.90)  | 4725         | 1.12 (0.84, 1.49)     | 5013 | 1.08 (0.77, 1.52)   | 4592  | 1.04 (0.58, 1.86)     | 4883 | 0.92 (0.57, 1.48)   |
| PM <sub>10</sub>             | 6605      | 1.93* (1.14, 3.26)    | 7216 | 1.50 (0.69, 3.26)   | 4725         | 0.99 (0.80, 1.23)     | 5013 | 0.98 (0.79, 1.21)   | 4592  | 0.94 (0.63, 1.4)      | 4883 | 0.91 (0.66, 1.25)   |
| Coarse PM                    | 6923      | 1.47* (1.12, 1.94)    | 7592 | 1.10 (0.84, 1.43)   | 4725         | 0.96 (0.83, 1.12)     | 5013 | 0.98 (0.85, 1.13)   | 4911  | 0.93 (0.71, 1.22)     | 5259 | 0.98 (0.79, 1.22)   |
| Traffic, nearest             | 6587      | 1.03 (0.90, 1.17)     | 7036 | 1.11* (1.04, 1.17)  | 4201         | 0.99 (0.83, 1.17)     | 4457 | 0.98 (0.93, 1.03)   | 4911  | 0.97 (0.86, 1.09)     | 5259 | 1.00 (0.94, 1.07)   |
| Traffic, major               | 6587      | 1.19 (0.95, 1.50)     | 7036 | 1.21* (1.07, 1.37)  | 4201         | 0.93 (0.78, 1.1)      | 4457 | 1.01 (0.9, 1.12)    | 4911  | 0.99 (0.79, 1.25)     | 5259 | 0.99 (0.86, 1.15)   |

Individual cohort models were adjusted for municipality (BAMSE), gender, older siblings, breastfeeding at 6 months, atopy of either parent, any daycare reported during follow-up, maternal smoking during pregnancy, any environmental tobacco smoke in the child's home reported during follow-up, visible mold or dampness in the home, gas stove, birth season, parental socio-economic status (low, medium, high), and intervention (GINIplus, MAAS, PIAMA).

\*Statistically significant elevated odds ratios ( $p < 0.05$ ). Associations are presented for the following increments in exposure: 10  $\mu\text{g}/\text{m}^3$  for NO<sub>2</sub>, 20  $\mu\text{g}/\text{m}^3$  for NO<sub>x</sub>, 5  $\mu\text{g}/\text{m}^3$  for PM<sub>2.5</sub>, 1 unit for PM<sub>2.5</sub> absorbance, 10  $\mu\text{g}/\text{m}^3$  for PM<sub>10</sub>, 5  $\mu\text{g}/\text{m}^3$  for coarse PM, 5,000 vehicles/day for traffic intensity on the nearest street; and 4,000,000 vehicle·m/day for traffic load on major roads within a 100 m buffer; associations with traffic intensity and traffic load were additionally adjusted for background NO<sub>2</sub> concentrations.

Supplemental Material, Table S6. Combined estimates stratified by parental socio-economic status.

|                              | N    | Low<br>OR (95% CI) | N    | Middle<br>OR (95% CI) | N    | High<br>OR (95% CI) |
|------------------------------|------|--------------------|------|-----------------------|------|---------------------|
| <b>Pneumonia</b>             |      |                    |      |                       |      |                     |
| NO <sub>2</sub>              | 1212 | 1.03 (0.55, 1.93)  | 5021 | 1.54 (1.18, 2.01)     | 9174 | 1.32 (1.00, 1.70)   |
| NO <sub>x</sub>              | 1212 | 0.82 (0.41, 1.64)  | 5021 | 1.57 (1.23, 1.99)     | 9174 | 1.27 (0.99, 1.62)   |
| PM <sub>2.5</sub>            | 1136 | 0.3 (0.03, 2.84)   | 4818 | 3.22 (1.19, 8.71)     | 9174 | 2.63 (0.81, 8.47)   |
| PM <sub>2.5</sub> absorbance | 1136 | 0.77 (0.15, 3.91)  | 4818 | 2.33 (1.28, 4.23)     | 9174 | 2.08 (1.37, 3.15)   |
| PM <sub>10</sub>             | 1136 | 0.32 (0.04, 2.57)  | 4818 | 1.65 (1.01, 2.71)     | 9174 | 1.68 (0.82, 3.43)   |
| Coarse PM                    | 1136 | 0.51 (0.12, 2.15)  | 4818 | 1.36 (0.97, 1.9)      | 9174 | 1.22 (0.90, 1.65)   |
| Traffic, nearest             | 1136 | 1.41 (0.95, 2.08)  | 4447 | 1.18 (1.05, 1.32)     | 9174 | 1.05 (0.98, 1.14)   |
| Traffic, major               | 1136 | 1.58 (0.63, 3.97)  | 4447 | 1.43 (1.14, 1.81)     | 9174 | 1.09 (0.86, 1.38)   |
| <b>Otitis Media</b>          |      |                    |      |                       |      |                     |
| NO <sub>2</sub>              | 813  | 0.92 (0.64, 1.32)  | 3767 | 1.21 (0.99, 1.47)     | 6284 | 1.07 (0.95, 1.19)   |
| NO <sub>x</sub>              | 813  | 0.84 (0.63, 1.12)  | 3767 | 1.11 (0.9, 1.37)      | 6284 | 1.05 (0.96, 1.16)   |
| PM <sub>2.5</sub>            | 697  | 0.35 (0.06, 1.96)  | 3555 | 1.06 (0.62, 1.83)     | 5486 | 1.16 (0.78, 1.74)   |
| PM <sub>2.5</sub> absorbance | 697  | 0.3 (0.05, 1.77)   | 3555 | 1.18 (0.85, 1.63)     | 5486 | 1.09 (0.81, 1.48)   |
| PM <sub>10</sub>             | 697  | 0.69 (0.24, 1.97)  | 3555 | 0.94 (0.66, 1.34)     | 5486 | 1.06 (0.88, 1.29)   |
| Coarse PM                    | 697  | 0.85 (0.42, 1.73)  | 3555 | 0.9 (0.76, 1.07)      | 5486 | 1.02 (0.9, 1.17)    |
| Traffic, nearest             | 596  | 0.76 (0.52, 1.12)  | 3184 | 1.05 (0.94, 1.16)     | 4878 | 0.95 (0.9, 1.01)    |
| Traffic, major               | 596  | 1.19 (0.62, 2.28)  | 3184 | 1.06 (0.88, 1.27)     | 4878 | 0.95 (0.81, 1.12)   |
| <b>Croup</b>                 |      |                    |      |                       |      |                     |
| NO <sub>2</sub>              | 703  | 0.37 (0.16, 0.87)  | 3454 | 1.03 (0.74, 1.43)     | 6013 | 1.00 (0.84, 1.20)   |
| NO <sub>x</sub>              | 703  | 0.42 (0.19, 0.93)  | 3454 | 1.09 (0.83, 1.45)     | 6013 | 1.02 (0.86, 1.21)   |
| PM <sub>2.5</sub>            | 703  | 0.64 (0.11, 3.91)  | 3454 | 1.36 (0.69, 2.66)     | 6013 | 0.82 (0.44, 1.54)   |
| PM <sub>2.5</sub> absorbance | 703  | 0.72 (0.11, 4.59)  | 3454 | 1.21 (0.61, 2.37)     | 6013 | 1.05 (0.64, 1.74)   |
| PM <sub>10</sub>             | 703  | 0.29 (0.06, 1.47)  | 3454 | 1.22 (0.78, 1.91)     | 6013 | 0.87 (0.58, 1.32)   |
| Coarse PM                    | 703  | 0.82 (0.13, 5.24)  | 3454 | 1.03 (0.76, 1.40)     | 6013 | 0.98 (0.74, 1.28)   |
| Traffic, nearest             | 703  | 1.04 (0.72, 1.50)  | 3454 | 0.97 (0.84, 1.11)     | 6013 | 1.00 (0.94, 1.07)   |
| Traffic, major               | 703  | 0.80 (0.12, 5.15)  | 3454 | 1.20 (0.90, 1.60)     | 6013 | 0.94 (0.75, 1.17)   |

Individual cohort models were adjusted for municipality (BAMSE), gender, older siblings, breastfeeding at 6 months, atopy of either parent, any daycare reported during follow-up, maternal smoking during pregnancy, any environmental tobacco smoke in the child's home reported during follow-up, visible mold or dampness in the home, gas stove, birth season, and intervention (GINIplus, MAAS, PIAMA).

Associations are presented for the following increments in exposure: 10 µg/m<sup>3</sup> for NO<sub>2</sub>, 20 µg/m<sup>3</sup> for NO<sub>x</sub>, 5 µg/m<sup>3</sup> for PM<sub>2.5</sub>, 1 unit for PM<sub>2.5</sub> absorbance, 10 µg/m<sup>3</sup> for PM<sub>10</sub>, 5 µg/m<sup>3</sup> for coarse PM, 5,000 vehicles/day for traffic intensity on the nearest street; and 4,000,000 vehicle·m/day for traffic load on major roads within a 100 m buffer; associations with traffic intensity and traffic load were additionally adjusted for background NO<sub>2</sub> concentrations.

Supplemental Material, Table S7. Combined estimates stratified by residential mobility.

|                              | Pneumonia |                       |       |                           | Otitis Media |                       |      |                           | Croup |                       |      |                           |
|------------------------------|-----------|-----------------------|-------|---------------------------|--------------|-----------------------|------|---------------------------|-------|-----------------------|------|---------------------------|
|                              | N         | Movers<br>OR (95% CI) | N     | Non-movers<br>OR (95% CI) | N            | Movers<br>OR (95% CI) | N    | Non-movers<br>OR (95% CI) | N     | Movers<br>OR (95% CI) | N    | Non-movers<br>OR (95% CI) |
| NO <sub>2</sub>              | 3796      | 1.62* (1.20, 2.18)    | 12098 | 1.21 (0.88, 1.67)         | 2545         | 1.03 (0.71, 1.48)     | 8427 | 1.08* (1.01, 1.16)        | 2985  | 0.82 (0.62, 1.1)      | 7139 | 1.03 (0.86, 1.24)         |
| NO <sub>x</sub>              | 3796      | 1.51* (1.16, 1.97)    | 12098 | 1.17 (0.91, 1.50)         | 2545         | 1.02 (0.76, 1.36)     | 8427 | 1.04 (0.97, 1.12)         | 2985  | 0.89 (0.69, 1.16)     | 7139 | 1.05 (0.88, 1.24)         |
| PM <sub>2.5</sub>            | 3495      | 4.11* (1.42, 11.9)    | 10443 | 2.10 (0.70, 6.36)         | 2421         | 0.94 (0.35, 2.49)     | 7286 | 1.07 (0.83, 1.38)         | 2847  | 0.92 (0.32, 2.61)     | 6624 | 0.92 (0.59, 1.44)         |
| PM <sub>2.5</sub> absorbance | 3495      | 3.6* (1.83, 7.1)      | 10443 | 1.66* (1.10, 2.50)        | 2421         | 1.08 (0.65, 1.8)      | 7286 | 1.08 (0.82, 1.42)         | 2847  | 0.64 (0.31, 1.32)     | 6624 | 1.15 (0.75, 1.77)         |
| PM <sub>10</sub>             | 3495      | 2.41 (0.81, 7.16)     | 10443 | 1.53 (0.82, 2.87)         | 2421         | 0.99 (0.52, 1.85)     | 7286 | 1.00 (0.84, 1.2)          | 2847  | 0.75 (0.49, 1.14)     | 6624 | 1.02 (0.75, 1.39)         |
| Coarse PM                    | 3633      | 2.12 (0.89, 5.03)     | 10957 | 1.24 (0.98, 1.57)         | 2421         | 0.88 (0.51, 1.52)     | 7286 | 1.01 (0.89, 1.14)         | 2985  | 0.76 (0.58, 1.01)     | 7139 | 1.11 (0.90, 1.38)         |
| Traffic, nearest             | 3564      | 1.17* (1.07, 1.28)    | 9988  | 1.06 (0.98, 1.14)         | 2313         | 1.00 (0.93, 1.08)     | 6317 | 0.95 (0.90, 1.01)         | 2985  | 0.97 (0.85, 1.1)      | 7139 | 1.00 (0.91, 1.09)         |
| Traffic, major               | 3564      | 1.30* (1.10, 1.54)    | 9988  | 1.12 (0.95, 1.32)         | 2313         | 1.02 (0.88, 1.19)     | 6317 | 0.96 (0.8, 1.14)          | 2985  | 0.85 (0.64, 1.11)     | 7139 | 1.07 (0.94, 1.23)         |

Individual cohort models were adjusted for municipality (BAMSE), gender, older siblings, breastfeeding at 6 months, atopy of either parent, any daycare reported during follow-up, maternal smoking during pregnancy, any environmental tobacco smoke in the child's home reported during follow-up, visible mold or dampness in the home, gas stove, birth season, parental socio-economic status (low, medium, high), and intervention (GINIplus, MAAS, PIAMA).

\*Statistically significant elevated odds ratios ( $p < 0.05$ ). Associations are presented for the following increments in exposure: 10  $\mu\text{g}/\text{m}^3$  for NO<sub>2</sub>, 20  $\mu\text{g}/\text{m}^3$  for NO<sub>x</sub>, 5  $\mu\text{g}/\text{m}^3$  for PM<sub>2.5</sub>, 1 unit for PM<sub>2.5</sub> absorbance, 10  $\mu\text{g}/\text{m}^3$  for PM<sub>10</sub>, 5  $\mu\text{g}/\text{m}^3$  for coarse PM, 5,000 vehicles/day for traffic intensity on the nearest street; and 4,000,000 vehicle·m/day for traffic load on major roads within a 100 m buffer; associations with traffic intensity and traffic load were additionally adjusted for background NO<sub>2</sub> concentrations.

Table S8. Combined estimates using back-extrapolated air pollution data.

|                   | <b>Pneumonia</b> |                    | <b>Otitis Media</b> |                    | <b>Croup</b> |                    |
|-------------------|------------------|--------------------|---------------------|--------------------|--------------|--------------------|
|                   | <b>N</b>         | <b>OR (95% CI)</b> | <b>N</b>            | <b>OR (95% CI)</b> | <b>N</b>     | <b>OR (95% CI)</b> |
| Difference method |                  |                    |                     |                    |              |                    |
| NO <sub>2</sub>   | 16059            | 1.33 (0.99, 1.78)  | 11115               | 1.05 (0.97, 1.14)  | 10170        | 0.98 (0.85, 1.14)  |
| NO <sub>x</sub>   | 16059            | 1.31* (1.05, 1.63) | 11115               | 1.02 (0.95, 1.10)  | 10170        | 1.01 (0.88, 1.16)  |
| PM <sub>10</sub>  | 14669            | 1.63 (0.99, 2.69)  | 9704                | 1.00 (0.86, 1.15)  | 10115        | 0.91 (0.72, 1.16)  |
| Ratio method      |                  |                    |                     |                    |              |                    |
| NO <sub>2</sub>   | 16059            | 1.25 (0.99, 1.58)  | 11115               | 1.05 (0.99, 1.12)  | 10170        | 1.00 (0.89, 1.14)  |
| NO <sub>x</sub>   | 16059            | 1.23* (1.02, 1.49) | 11115               | 1.01 (0.96, 1.06)  | 10170        | 1.02 (0.93, 1.11)  |
| PM <sub>10</sub>  | 14669            | 1.57* (1.00, 2.47) | 9704                | 0.99 (0.87, 1.12)  | 10115        | 0.92 (0.76, 1.12)  |

Individual cohort models were adjusted for municipality (BAMSE), gender, older siblings, breastfeeding at 6 months, atopy of either parent, any daycare reported during follow-up, maternal smoking during pregnancy, any environmental tobacco smoke in the child's home reported during follow-up, visible mold or dampness in the home, gas stove, birth season, parental socio-economic status (low, medium, high), and intervention (GINIplus, MAAS, PIAMA). \* Statistically significant elevated odds ratios ( $p < 0.05$ ). Associations are presented for the following increments in exposure: 10  $\mu\text{g}/\text{m}^3$  for NO<sub>2</sub>, 20  $\mu\text{g}/\text{m}^3$  for NO<sub>x</sub>, 10  $\mu\text{g}/\text{m}^3$  for PM<sub>10</sub>.
